# Supplementary material for: Clinical Outcomes of Thymic Carcinoma: The Role of Radiotherapy Combined with Multimodal Treatments
Source: MDPI journal article supplement (doi:10.3390/cancers15082262), 2023-04-12
Supplement: s1 [file s1]

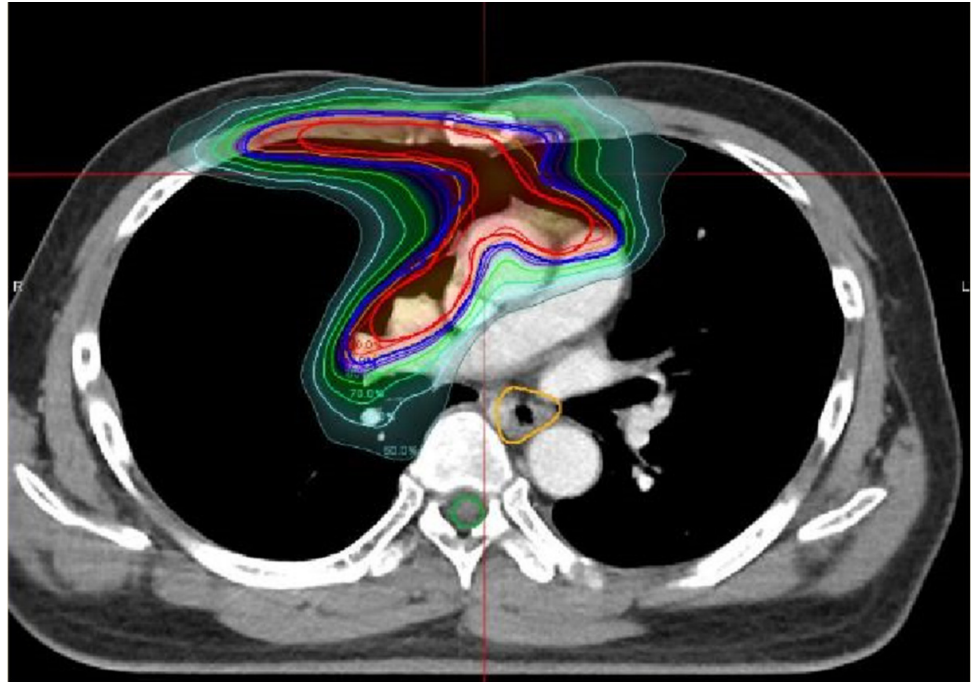

**Figure S1. a.** A representative case of intensity-modulated radiotherapy plan using simultaneous integrated boost technique.

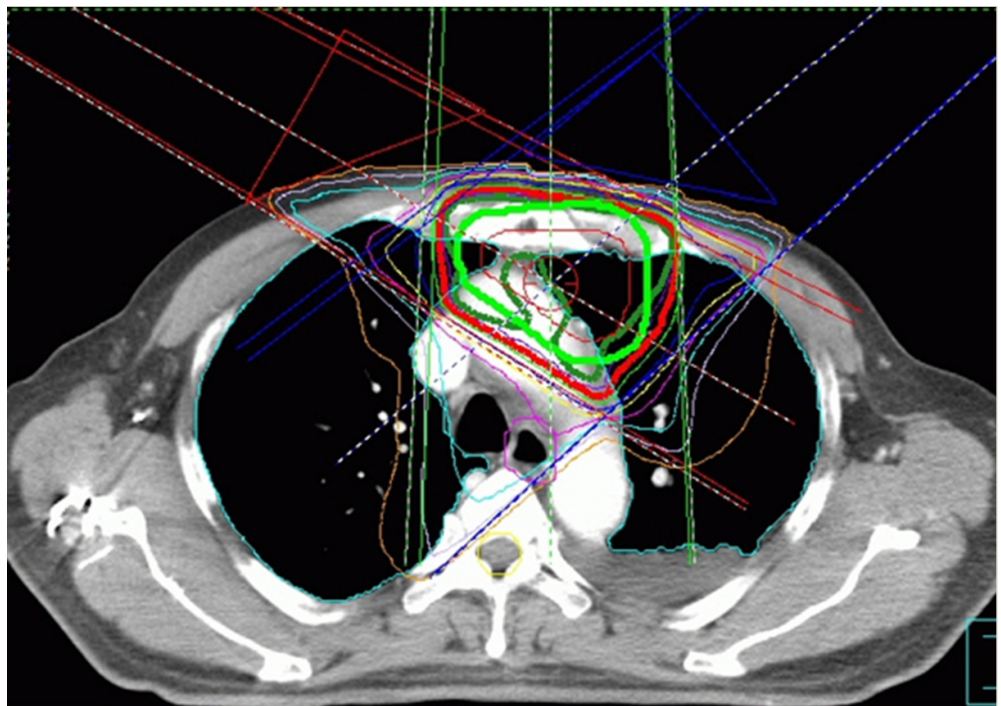

**Figure S1. b.** A representative case of three-dimensional conformal radiotherapy plan.

**Table S1.** Details of failed regional lymph nodes after radiotherapy in patients with regional lymph node metastasis at initial diagnosis.

|           | <b>Involved regional lymph nodes<br/>at initial diagnosis</b>             | <b>Failed regional lymph nodes<br/>after RT</b>  | <b>RT dose<br/>(Gy)</b> |
|-----------|---------------------------------------------------------------------------|--------------------------------------------------|-------------------------|
| Patient 1 | N2<br>(Hilar, Lt. Interlobar lymph node)                                  | N2<br>(Outfield, Lt. Paratracheal lymph node)    | 50                      |
| Patient 2 | N3<br>(Rt. Neck level V lymph node)                                       | N3<br>(Outfield, Lt. Neck node)                  | 54                      |
| Patient 3 | N1, N3<br>(Lt. Neck, cardiophrenic angle, Lt. Supraclavicular lymph node) | N2<br>(Outfield, Pericardial)                    | 59.4                    |
| Patient 4 | N3<br>(Rt. Neck node)                                                     | N2, N3<br>(Outfield, Pericardial, Lt. Neck node) | 64                      |
| Patient 5 | N2<br>(Mediastinal, paratracheal, retrosternal lymph node)                | N2<br>(Outfield, Subcarinal lymph node)          | 60                      |
| Patient 6 | N1, N2<br>(Internal mammary, both paratracheal, prevascular lymph node)   | N3<br>(Outfield, Rt. Neck node)                  | 50                      |

RT, radiotherapy; Lt, Left; Rt, Right.

**Table S2.** Toxicity according to treatment modalities.

| <b>Variables, n (%)</b>  | <b>IMRT<br/>(n=83)</b> | <b>3D-CRT<br/>(n=33)</b> | <b>P</b> |
|--------------------------|------------------------|--------------------------|----------|
| Overall toxicity         | 18 (21.7)              | 23 (69.7)                | <0.001   |
| No toxicity              | 65 (78.3)              | 10 (30.3)                |          |
| Radiation pneumonitis    | 8 (10.7)               | 5 (15.2)                 | 0.157    |
| No radiation pneumonitis | 75 (90.4)              | 28 (84.8)                |          |
| Esophagitis              | 4 (4.8)                | 6 (18.2)                 | 0.021    |
| No esophagitis           | 79 (95.2)              | 27 (81.8)                |          |

IMRT, intensity-modulated radiotherapy; 3D-CRT, three-dimensional conformal radiotherapy.
